# Supplementary material
Source: Springer Nature journal article supplement (https://www.springermedizin.de/resource/supplementary/12937_2011_401_MOESM1_ESM.pdf/25653312)

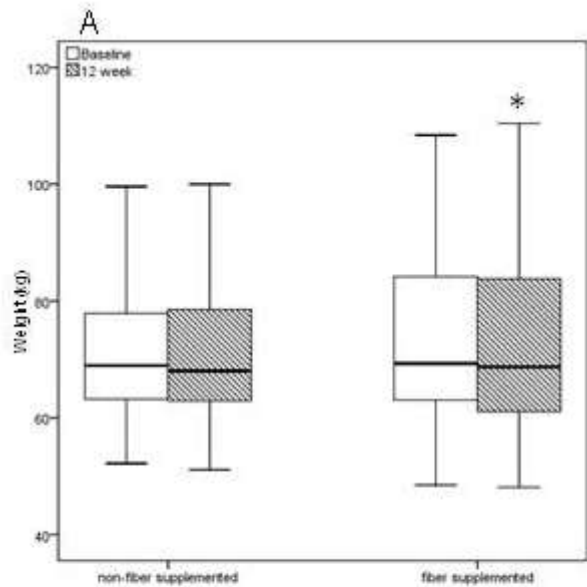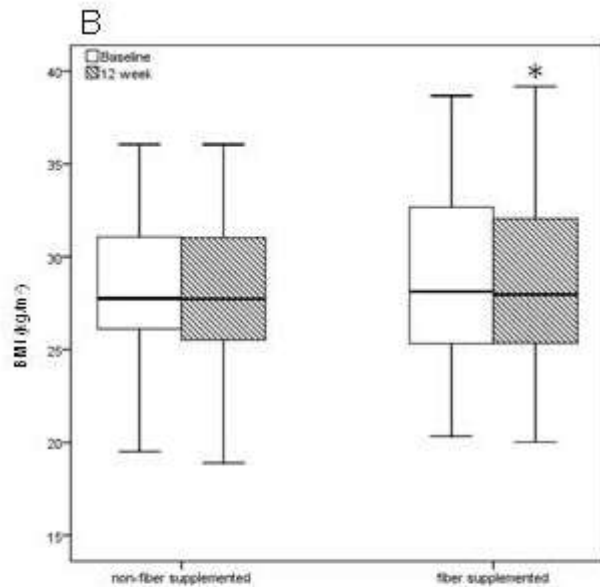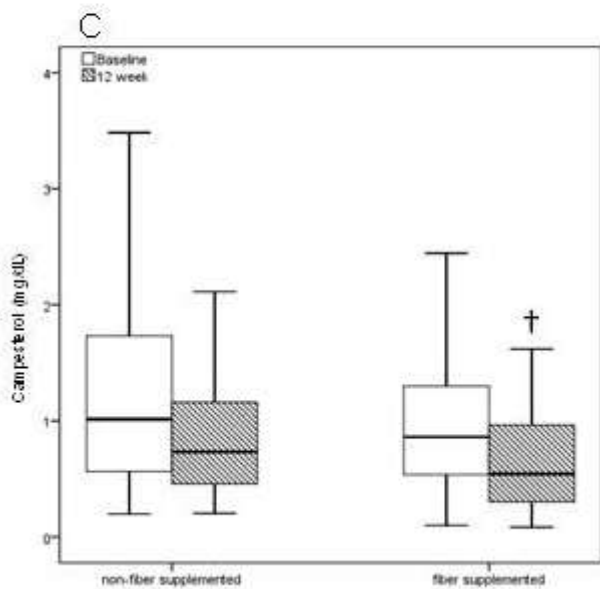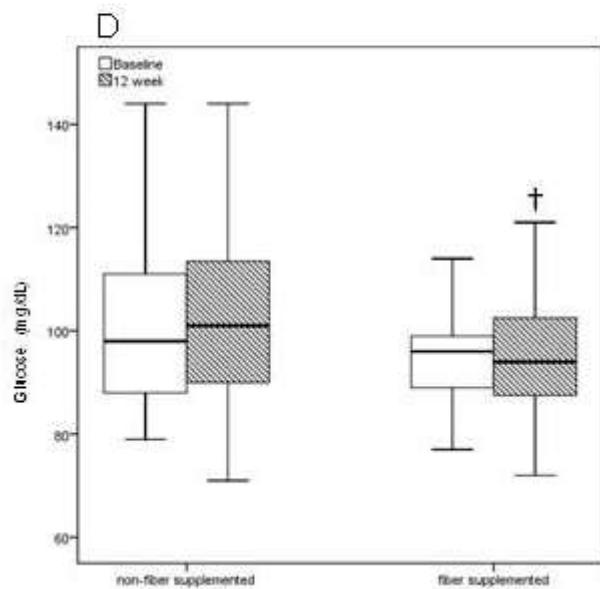

Supplement: MOESM1 [file 25653312]
